# Supplementary material for: Characterization of the Histidine-Rich Loop of Arabidopsis Vacuolar Membrane Zinc Transporter AtMTP1 as a Sensor of Zinc Level in the Cytosol
Source: Oxford University Press journal article supplement (doi:10.1093/pcp/pcu194), 2014-12-15

## Supplementary data

### Characterization of the Histidine-rich Loop of *Arabidopsis* Vacuolar Membrane Zinc Transporter AtMTP1 as A Sensor of Zinc Level in Cytosol

Natsuki Tanaka, Takashi Fujiwara, Rie Tomioka, Ute Krämer, Miki Kawachi, and Masayoshi Maeshima

Legends for supplemental figures

**Fig. S1.** Membrane topology of unmodified AtMTP1 (upper panel) and His-half-deleted AtMTP1 (His-half AtMTP1, lower panel). A schematic membrane topology of AtMTP1 was constructed by the homology modeling of *E. coli* YiiP (Lu et al. 2007, Kawachi et al. 2012). The His-half mutant lacks the first half (His-182 to His-216) of the whole His-loop from His-182 to Asn-251.

**Fig. S2.** The growth suppression of *mtp1-1* under Zn-excess conditions was recovered by expressing the AtMTP1 (35S-MTP1) and the His-half AtMTP1 (35S-His-half). Ws, *mtp1-1*, 35S-MTP1, and 35S-His-half lines were grown in the modified Hoagland medium containing Zn at concentrations of 0, 100, 200, or 250  $\mu$ M. After 10 d, root length was measured. Values are expressed as mean  $\pm$  SD;  $n = 21$ . Significant differences from *mtp1-1* at each Zn concentration are indicated by asterisks ( $*P < 0.00002$ ).

**Fig. S3.** Expression levels of AtMTP1 and AtMTP3 in Ws and mutant lines. Total RNA fractions were prepared from 22-d-old whole plants of Ws, *mtp1-1*, 35S-MTP1, and 35S-His-half lines and then subjected to real-time RT-PCR analyses of mRNA levels of *AtMTP1* and *AtMTP3*. Three replicates with 72 plants were averaged and the SD is shown. Seedlings were grown in modified Hoagland medium with (5  $\mu$ M; A and B) or without (0  $\mu$ M; A) Zn. Values are expressed as mean  $\pm$  SD;  $n = 3$ . Significant differences from Ws are indicated by asterisks ( $*P < 0.006$ ). The mRNA levels of MTP3 showed no significant difference.

**Fig. S4.** 35S-His-half lines grew poorly with TPEN. Seedlings of Ws, *mtp1-1*, 35S-MTP1, and 35S-His-half lines were grown in modified Hoagland medium without Zn and supplemented with 1  $\mu$ M TPEN, a Zn chelator. Typical 7-week-old plants were photographed (A) and measured for shoot fresh weight (B). For each line, four plants were independently analyzed. Values are expressed as mean  $\pm$  SD. No significant difference from Ws was detected.

Fig. S1 (Tanaka et al.)

Wild-type

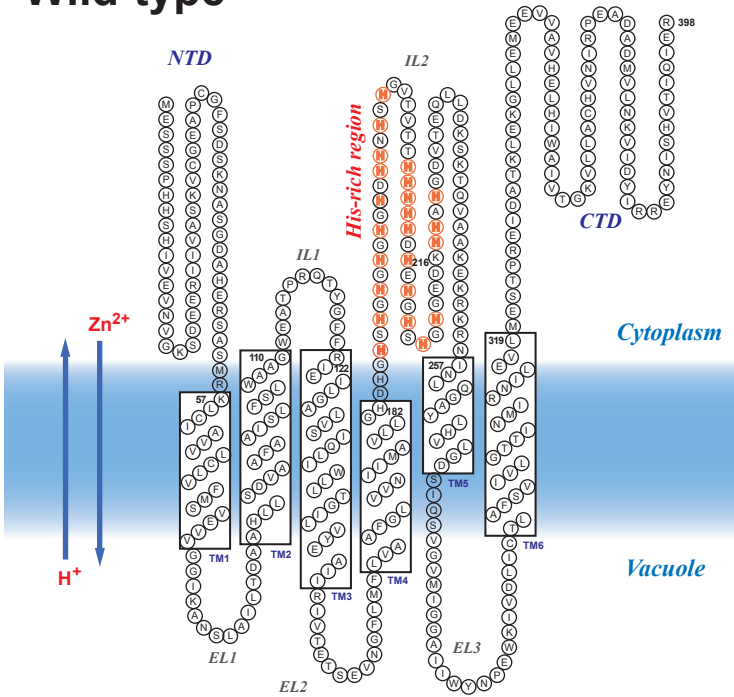

His-half

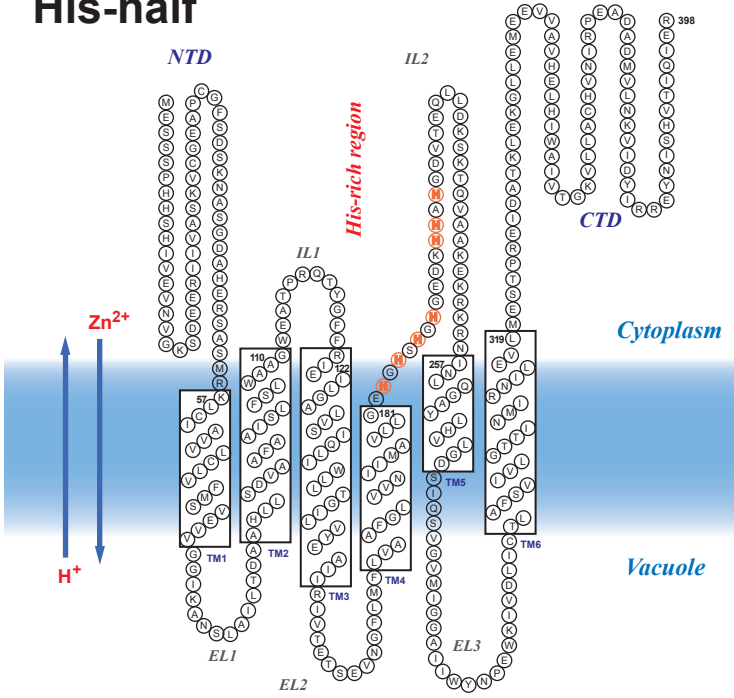

Fig. S2 (Tanaka et al.)

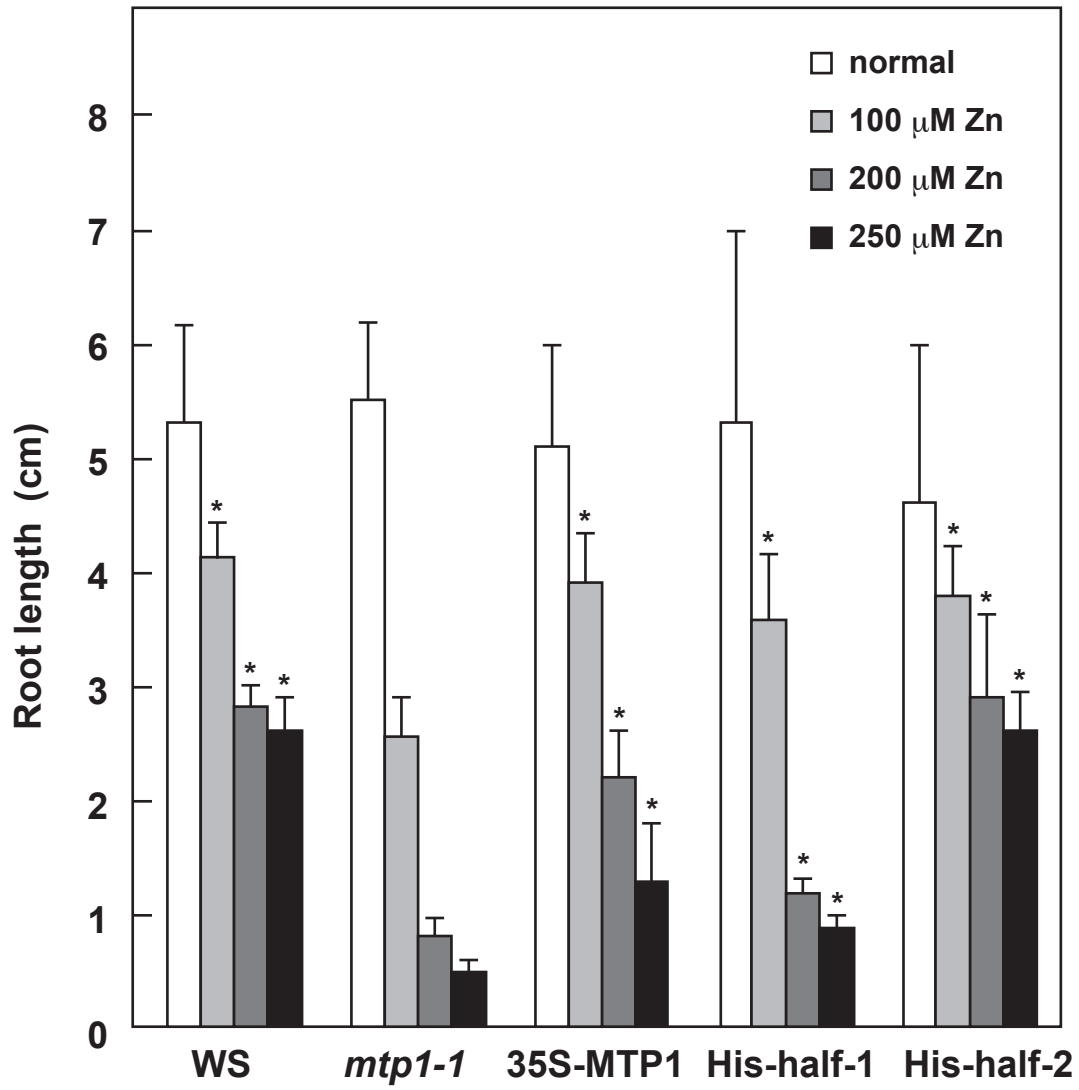

Fig. S3 (Tanaka et al.)

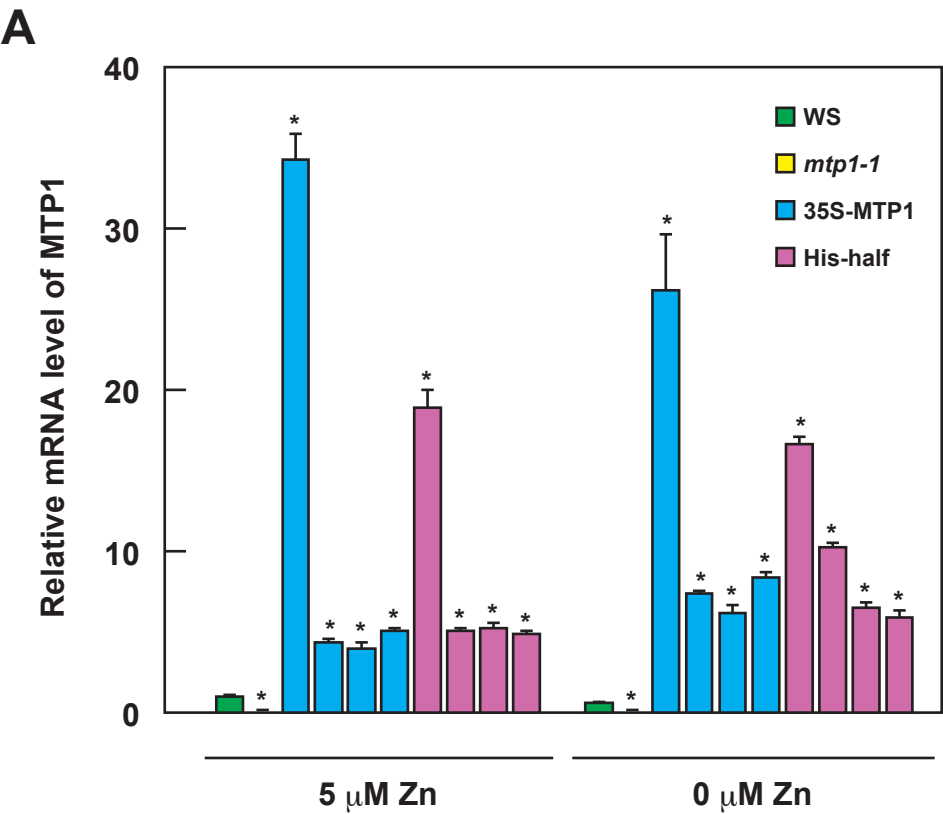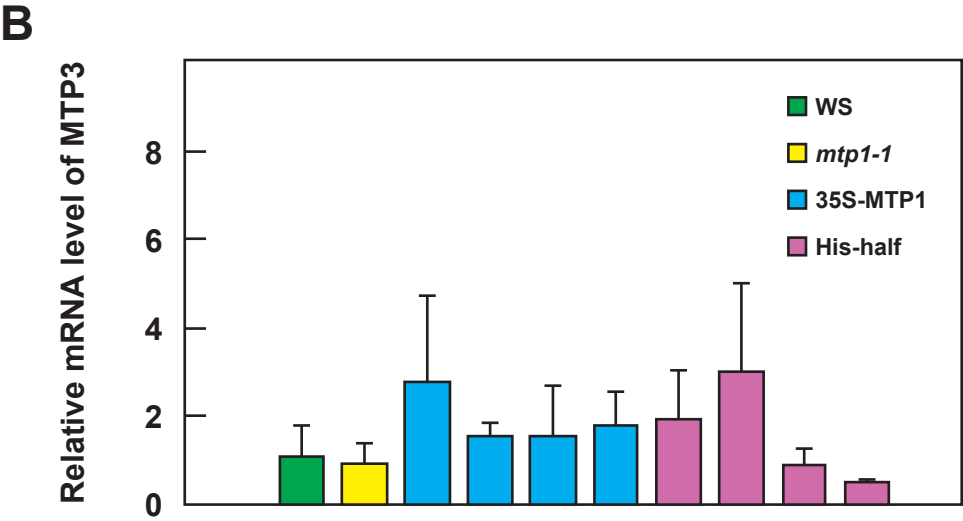

Fig. S4 (Tanaka et al.)

A

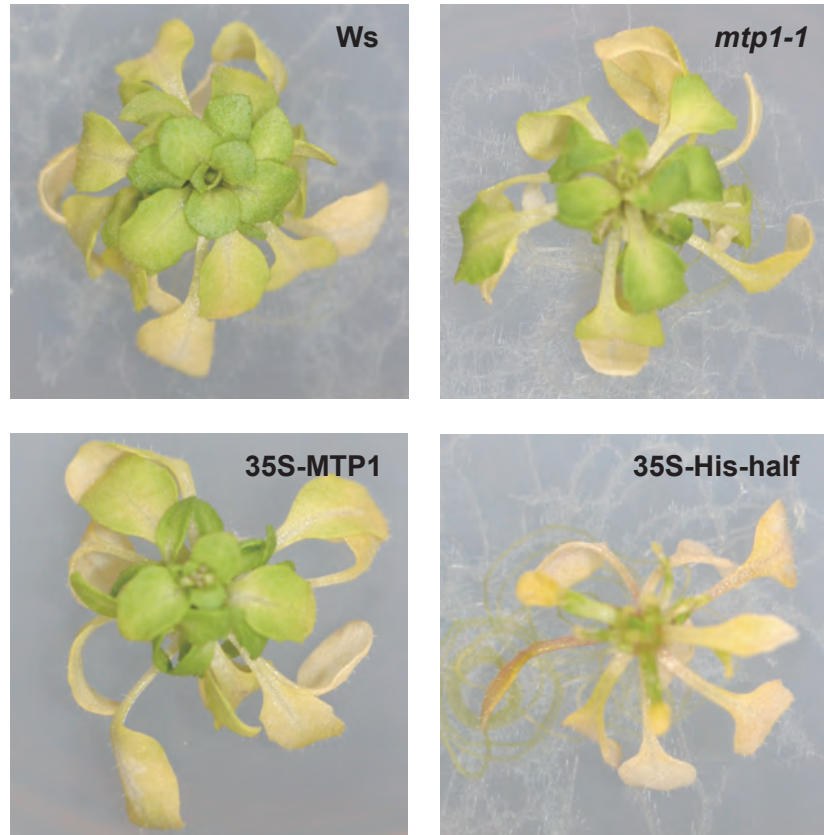

B

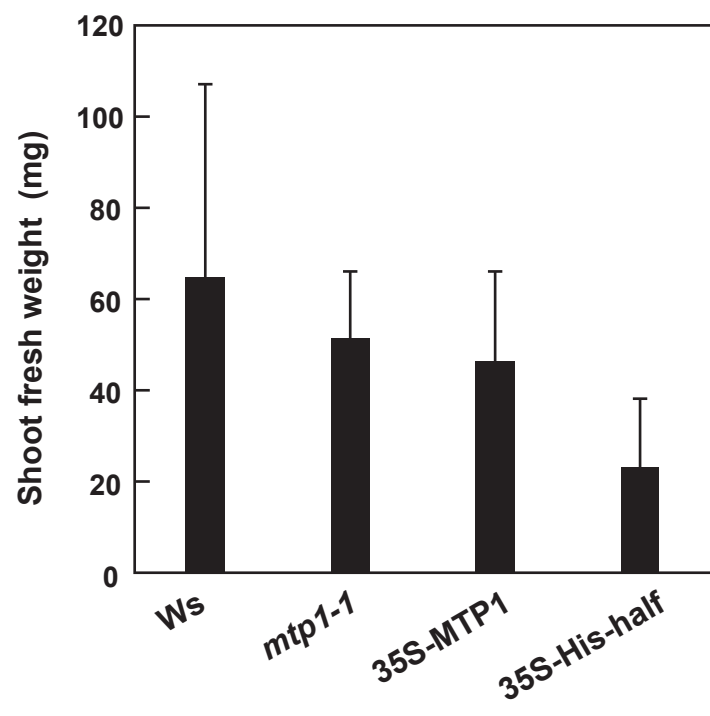

Supplement: pcu194_Supplementary_Data.zip [file pcu194_Supplementary_Data.zip]
